# Supplementary material
Source: ML conference proceedings conference paper supplement (https://proceedings.neurips.cc/paper_files/paper/2020/hash/1cf44d7975e6c86cffa70cae95b5fbb2-Abstract.html)
Supplement: Supplementary file [file 1cf44d7975e6c86cffa70cae95b5fbb2-Supplemental.pdf]

---

# Supplementary Material of ShiftAddNet

---

Haoran You<sup>†</sup>, Xiaohan Chen<sup>‡</sup>, Yongan Zhang<sup>†</sup>, Chaojian Li<sup>†</sup>, Sicheng Li<sup>◊</sup>, Zihao Liu<sup>◊</sup>,  
Zhangyang Wang<sup>‡</sup>, and Yingyan Lin<sup>†</sup>

<sup>†</sup>Department of Electrical and Computer Engineering, Rice University

<sup>‡</sup>Department of Electrical and Computer Engineering, The University of Texas at Austin

<sup>◊</sup>Alibaba DAMO Academy

## 1 Visualize the divergence of different classes

To further analyze the improved robustness (for quantizing) of combining two weak players: shift and add, we compare the discriminative power of AdderNet and ShiftAddNet. Specifically, we visualize the class divergences using the  $t$ -distributed stochastic neighbor embedding (t-SNE) algorithm [4], which is well-suited for embedding high-dimensional data for visualization in a low-dimensional space of two or three dimensions (2/3-D). After reducing the dimensions of learned features to 2/3-D, we are then able to analyze the discrimination among different classes, which further allows us to compare the effectiveness of different networks. As shown in Fig. 1, the 2/3-D visualization show that **the proposed ShiftAddNet discriminate different classes better** (i.e., the boundary among different classes can be easier to identify as compared to AdderNet [2]) for both the floating point (FP32) and fixed point (FIX8) scenarios.

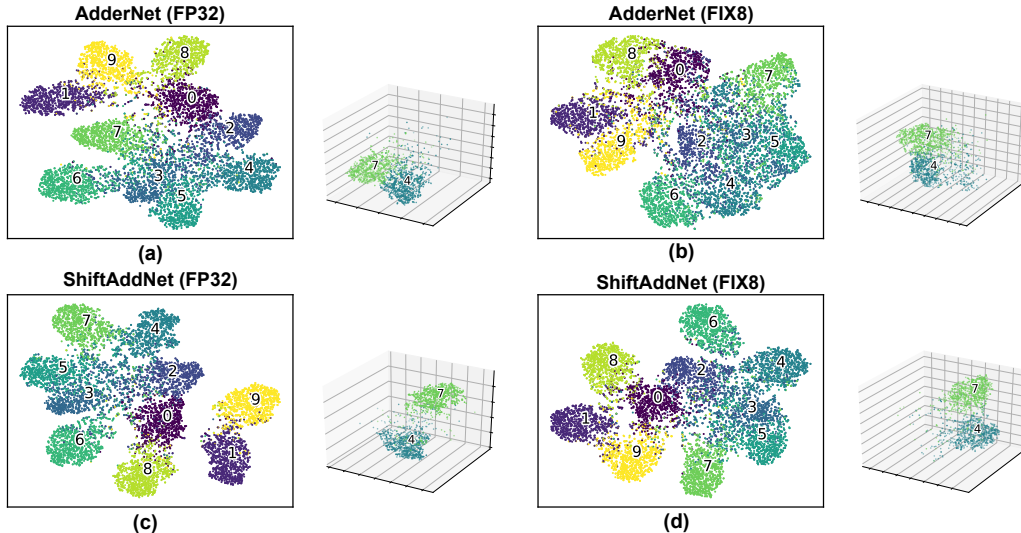

Figure 1: T-SNE visualization of the class divergences in AdderNet [2], and the proposed ShiftAddNet, using ResNet-20 on CIFAR-10 as an example.

## 2 Evaluation on two more IoT datasets.

**Accuracy and training costs tradeoffs.** We evaluate DCNN [3] on the popular MHEALTH [1] and USCHAD [5] IoT benchmarks. As shown in Fig. 2 (a) and (b), ShiftAddNet again consistently outperforms the baselines under all settings in terms of efficiency-accuracy trade-offs: (1) **over AdderNet**: ShiftAddNet reduces 32.8% ~ 90.6% energy costs while resulting comparable accuracies

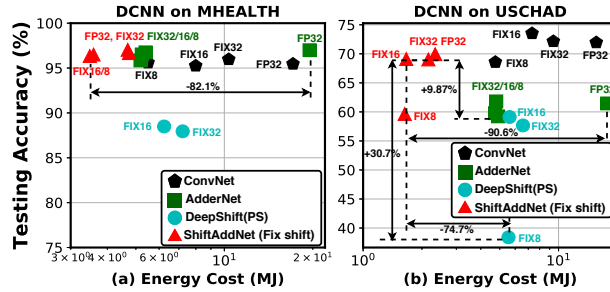

Figure 2: Testing accuracy vs. energy cost comparisons on IoT datasets.

(-0.65% ~ 9.87%); and (2) **over DeepShift**: ShiftAddNet achieves 7.85% ~ 30.7% higher accuracies while requiring 44.1% ~ 74.7% less energy costs.

**Inference costs:** As shown in Fig. 2 (a), when training DCNN on IoT dataset, ShiftAddNet with fixed shift layers (FIX32) costs 1.7 J, where AdderNet (FIX32) costs 1.9 J and DeepShift (FIX32) costs 2.6 J, respectively, leading to 10.5% / 34.6% savings.

## References

- [1] Oresti Banos, Rafael Garcia, Juan A Holgado-Terriza, Miguel Damas, Hector Pomares, Ignacio Rojas, Alejandro Saez, and Claudia Villalonga. mhealthdroid: a novel framework for agile development of mobile health applications. In *International workshop on ambient assisted living*, pages 91–98. Springer, 2014.
- [2] Hanting Chen, Yunhe Wang, Chunjing Xu, Boxin Shi, Chao Xu, Qi Tian, and Chang Xu. Addernet: Do we really need multiplications in deep learning? *The IEEE Conference on Computer Vision and Pattern Recognition*, 2020.
- [3] Wenchao Jiang and Zhaozheng Yin. Human activity recognition using wearable sensors by deep convolutional neural networks. In *Proceedings of the 23rd ACM international conference on Multimedia*, pages 1307–1310, 2015.
- [4] Laurens Van der Maaten. t-distributed stochastic neighbor embedding (t-sne), 2014.
- [5] Mi Zhang and Alexander A Sawchuk. Usc-had: a daily activity dataset for ubiquitous activity recognition using wearable sensors. In *Proceedings of the 2012 ACM Conference on Ubiquitous Computing*, pages 1036–1043, 2012.
